# Supplementary material for: Zn@ZrO2 nanoparticles decorated on naringin-based sensor for electrochemical detection of p-nitrophenol and o-nitrophenol
Source: Royal Society of Chemistry journal article supplement (doi:10.1039/d3nj05410a), 2024-01-01
Supplement: d3nj05410a1.pdf [file d3nj05410a1.pdf]

## **Zn@ZrO<sub>2</sub> Nanoparticles Decorated on Naringin - Based Sensor for Electrochemical Detection of *p*-Nitrophenol and *o*-Nitrophenol**

**Ramesh Madhaiyan<sup>a</sup>, Umamatheswari Seeman<sup>a\*</sup>, Sankar Chinnusamy<sup>b\*</sup>,  
and Jayavel Ramasamy<sup>c</sup>**

<sup>a</sup>PG and Research Department of Chemistry, Government Arts College (Affiliated to Bharathidasan University), Tiruchirappalli - 620 022, Tamil Nadu, India.

<sup>b</sup>Department of Chemistry, Velammal College of Engineering and Technology, Madurai – 625 009, Tamil Nadu, India.

<sup>c</sup>Centre for Nanoscience and Technology, Anna University, Chennai - 600 025, Tamil Nadu, India.

---

\* Corresponding author, Tel.; +91-8438288510  
E. mail: drsumamatheswari@gmail.com (Dr. S. Umamatheswari)  
\* Corresponding author, Tel.; +91-9944585257  
E. mail: sankchem@gmail.com (Dr. C. Sankar)

## 1.1. Characterization

The crystalline planes of the Zn@ZrO<sub>2</sub>/NG nanocomposite were analyzed by XRD (BRUKER Eco D8 advance with Cu - K $\alpha$  radiations = 1.54 Å). The absorption spectrum were further analyzed by FT-IR (IRTRACER-100), HR-SEM and EDX measurements were performed on (HR - SEM, Thermo scientific Apreos), HR-TEM measurements were performed on (HR-TEM, JEOL, JEM - 2100 plus, Japan), XPS measurements were conducted on (PHI Versaprobe III).

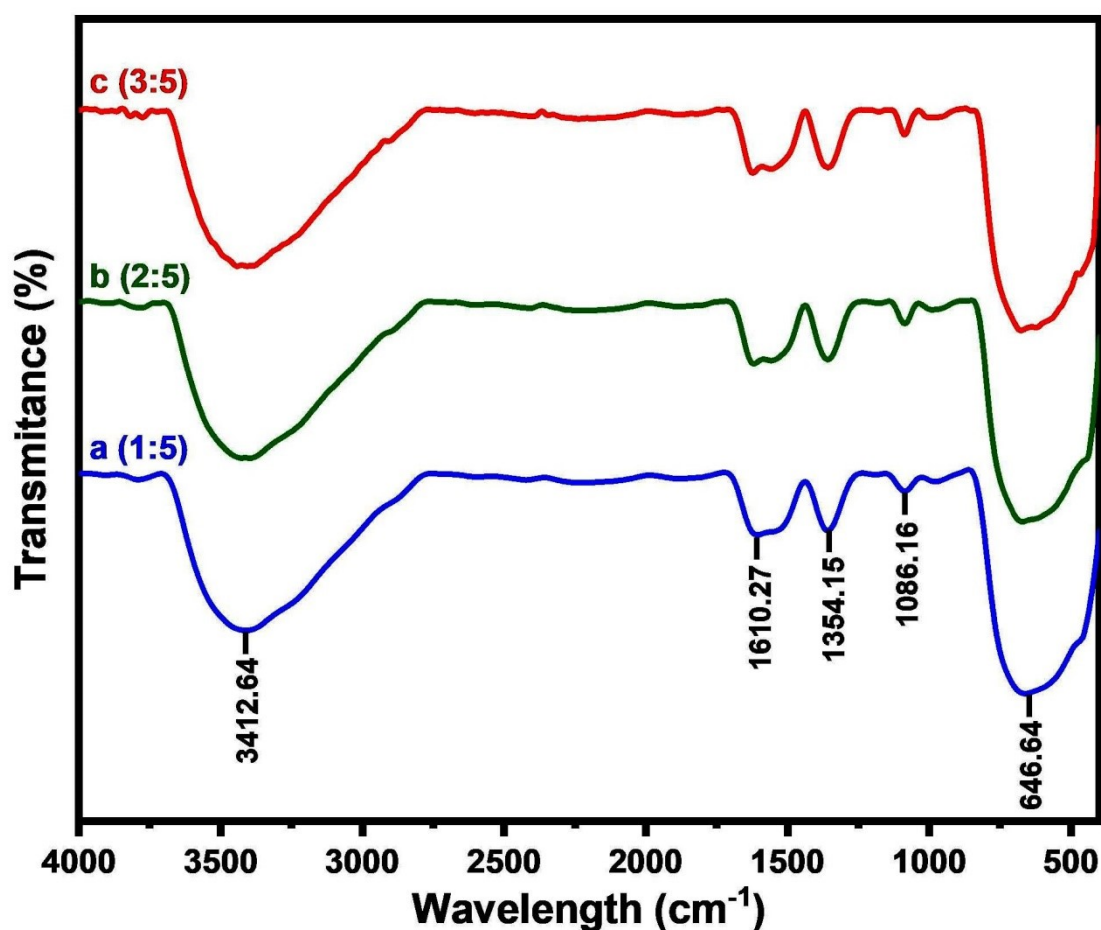

Fig. S1: FT-IR spectrum of different Zn@ZrO<sub>2</sub> combined with NG nanocomposites.

## Effect of Zn@ZrO<sub>2</sub> concentration and pH

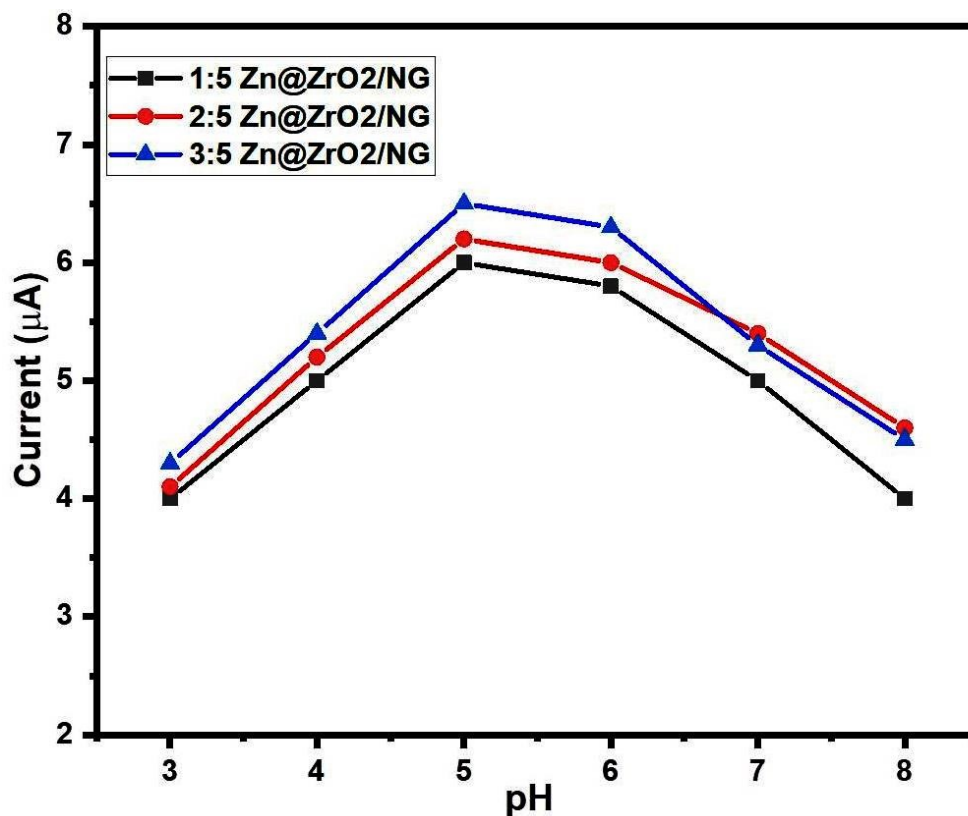

**Fig. S2:** Comparison plot of different Zn@ZrO<sub>2</sub> combined with NG with different pH.

In a bid to find the ideal operating pH and additive amount, the responses of Zn@ZrO<sub>2</sub>/NG sensors with different Zn@ZrO<sub>2</sub> content (1:5, 2:5 and 3:5) combined with NG to 10 µM PNP were measured at various operating pH. The sensor exhibiting a concentration of Zn@ZrO<sub>2</sub>/NG (3:5) displays the most significant reaction in detecting PNP when compared to the other concentrations. Additionally, the sensor's reaction to PNP detection is influenced by the operating pH. Each curve demonstrates a peak reaction at the optimal pH of 5. Based on the previously mentioned findings, it is evident that the Zn@ZrO<sub>2</sub>/NG (3:5) sensor has a superior response and operates at a lower pH compared to the other sensors. Therefore, subsequent experiments were conducted using the identical composition Zn@ZrO<sub>2</sub>/NG (3:5) and optimal pH (5) in order to examine the sensing capabilities of PNP and ONP.

**Table. S1.** Concentration of PNP and ONP for DPV analysis

| S. No | Sets | PNP               | ONP               |
|-------|------|-------------------|-------------------|
| 1.    | 1    | 1 $\mu\text{M}$   | 1 $\mu\text{M}$   |
| 2.    |      | 2 $\mu\text{M}$   | 2 $\mu\text{M}$   |
| 3.    |      | 3 $\mu\text{M}$   | 3 $\mu\text{M}$   |
| 4.    |      | 4 $\mu\text{M}$   | 4 $\mu\text{M}$   |
| 5.    |      | 5 $\mu\text{M}$   | 5 $\mu\text{M}$   |
| 6.    | 2    | 10 $\mu\text{M}$  | 10 $\mu\text{M}$  |
| 7.    |      | 20 $\mu\text{M}$  | 20 $\mu\text{M}$  |
| 8.    |      | 30 $\mu\text{M}$  | 30 $\mu\text{M}$  |
| 9.    |      | 40 $\mu\text{M}$  | 40 $\mu\text{M}$  |
| 10.   |      | 50 $\mu\text{M}$  | 50 $\mu\text{M}$  |
| 11.   | 3    | 100 $\mu\text{M}$ | 100 $\mu\text{M}$ |
| 12.   |      | 200 $\mu\text{M}$ | 200 $\mu\text{M}$ |
| 13.   |      | 300 $\mu\text{M}$ | 300 $\mu\text{M}$ |
| 14.   |      | 400 $\mu\text{M}$ | 400 $\mu\text{M}$ |
| 15.   |      | 500 $\mu\text{M}$ | 500 $\mu\text{M}$ |

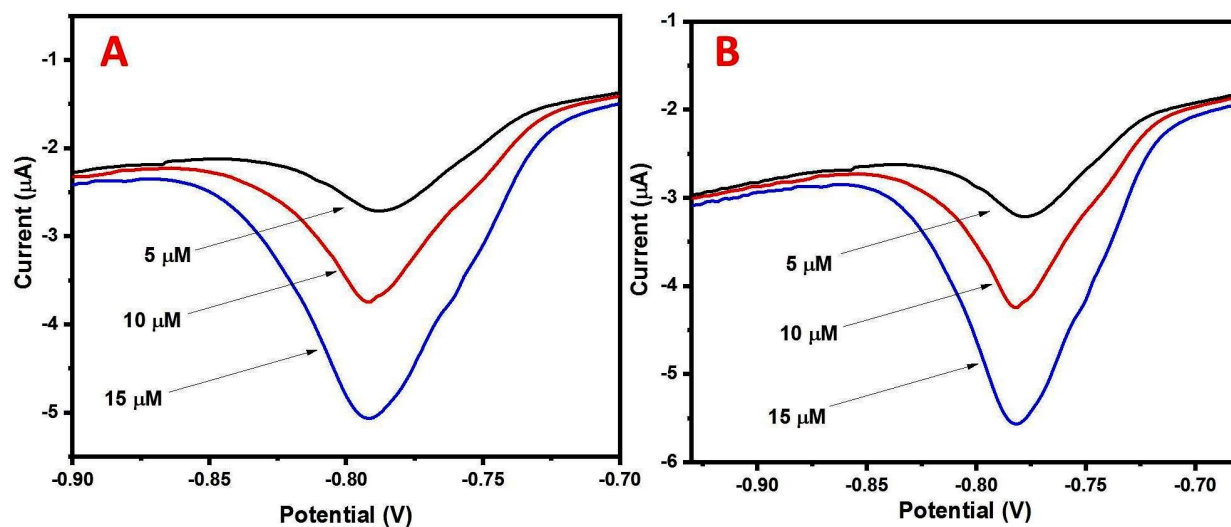

**Fig. S3:** A) PNP detection in tap water samples. B) PNP detection in river water samples.

**Table. S2.** Comparison of previously reported electrochemical detection of PNP

| Materials                                       | Linear range ( $\mu\text{M}$ ) | LOD ( $\mu\text{M}$ ) | Sensitivity ( $\mu\text{A mM}^{-1} \text{cm}^{-2}$ ) | References          |
|-------------------------------------------------|--------------------------------|-----------------------|------------------------------------------------------|---------------------|
| ZnO/GCE                                         | 10 – 1000                      | 13                    | 404.35                                               | 1                   |
| meso-ZnCo <sub>2</sub> O <sub>4</sub> /GCE      | 1 – 4000                       | 0.3                   | 0.318                                                | 2                   |
| Fe <sub>3</sub> O <sub>4</sub> @AT-COFs         | 10 – 3000                      | 0.2361                | –                                                    | 3                   |
| Nano-gold/GCE                                   | 10 – 100                       | 8                     | –                                                    | 4                   |
| AgPd@UiO-66-NH <sub>2</sub>                     | 100 – 370                      | 0.032                 | –                                                    | 5                   |
| Cu-curcumin                                     | 0.1 – 1030                     | 0.068                 | 1.57                                                 | 6                   |
| DVD@NP.Au/Hg                                    | 5 – 250                        | 1                     | –                                                    | 7                   |
| $\gamma$ -Fe <sub>2</sub> O <sub>3</sub> -N-rGO | 0.1 – 1000                     | 0.1                   | 0.6                                                  | 8                   |
| GCE/Ag NPs-chi                                  | 0.07 – 2                       | 0.07                  | –                                                    | 9                   |
| Zn@ZrO <sub>2</sub> /NG-GCE                     | 1 – 500                        | 1.14                  | 5.05                                                 | <b>Present work</b> |

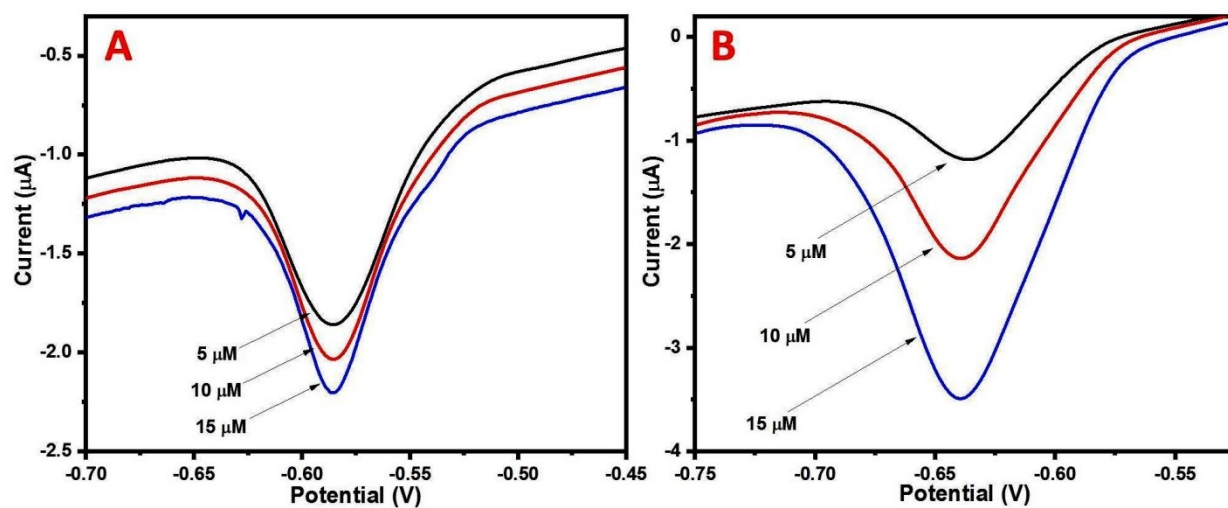

**Fig. S4:** A) ONP detection in tap water samples. B) ONP detection in river water samples.

**Table. S3.** Comparison of previously reported electrochemical detection of ONP

| <b>Materials</b>                       | <b>Linear range (<math>\mu\text{M}</math>)</b> | <b>LOD (<math>\mu\text{M}</math>)</b> | <b>Sensitivity (<math>\mu\text{A mM}^{-1} \text{cm}^{-2}</math>)</b> | <b>References</b> |
|----------------------------------------|------------------------------------------------|---------------------------------------|----------------------------------------------------------------------|-------------------|
| RGO@CuO@Mn <sub>2</sub> O <sub>3</sub> | 0.5 – 126                                      | 0.021                                 | 4                                                                    | 10                |
| Fe <sub>3</sub> O <sub>4</sub> @AT-COF | 10 – 3000                                      | 0.657                                 | 0.041                                                                | 11                |
| C/N-Au-600e/GCE                        | 0.1 – 320                                      | 0.043                                 | –                                                                    | 12                |
| C/N-Au                                 | 0.1 – 320                                      | 0.049                                 | –                                                                    | 13                |
| FeSe <sub>2</sub>                      | 10 – 100                                       | 0.036                                 | –                                                                    | 14                |
| Mn-MOF@RGO/GCE                         | 0.5 – 180                                      | 0.078                                 | –                                                                    | 15                |
| CoC@Mn                                 | 5 – 100                                        | 0.16                                  | –                                                                    | 16                |
| Zn@ZrO <sub>2</sub> /NG-GCE            | 1 – 500                                        | 1.03                                  | 3.38                                                                 | Present work      |

## References

1. A. Sinhamahapatra, D. Bhattacharjya, J.S. Yu, *RSC Adv.* 2015, **5**, 37721–37728. DOI: 10.1039/c5ra06286a.
2. J. Zhang, S. Cui, Y. Ding, X. Yang, K. Guo, J.T. Zhao, *Biosens. Bioelectron.* 2018, **112**, 177–185. DOI: 10.1016/j.bios.2018.03.021.
3. Q. Wang, R. Li, Y. Zhao, T. Zhe, T. Bu, Y. Liu, *Talanta.* 2020, **219**, 121255. DOI: 10.1016/j.talanta.2020.121255.
4. L. Chu, L. Han, X. Zhang, *J. Appl. Electrochem.* 2011, **41**, 687–694. DOI: 10.1007/s10800-011-0281-4.
5. S.A. Hira, M. Nallal, K.H. Park, *Sens. Actuat. B: Chem.* 2019, **298**, 126861. DOI: 10.1016/j.snb.2019.126861.
6. B. Dinesh, R. Saraswathi, *Sens. Actuat. B: Chem.* 2017, **253**, 502–512. DOI: 10.1016/j.snb.2017.06.149.
7. F. Afzali, M.H. Arbab Zavar, G. Rounaghi, N. Ashraf, *Electrochim. Acta*, 2016, **209**, 654–660. DOI: 10.1016/j.electacta.2016.05.125.
8. A.G. Ramu, S. Salla, S. Gopi, P. Silambarasan, D.J. Yang, M.J. Song, *Chemosphere*, 2021, **268**, 128853. DOI: 10.1016/j.chemosphere.2020.128853.
9. C.A. de Lima, P.S. da Silva, A. Spinelli, *Sens. Actuat. B: Chem.* 2014, **196**, 39–45. DOI: 10.1016/j.snb.2014.02.005.
10. B. Sriram, S. Kogularasu, S.F. Wang, J.K. Sheu, *New. J. Chem.* 2020, **44**, 12465–12472. DOI: 10.1039/D0NJ02118K.
11. Q.Z. Wang, R. Li, Y.J. Zhao, T.T. Zhe, T. Bu, Y.N. Liu, X. Sun, H. Hu, M. Zhang, X. Zheng, L. Wang, *Talanta*, 2020, **219**, 121255. DOI: 10.1016/j.talanta.2020.121255.
12. H.-F. Zhou, S.-X. Li, Y.-J. Wu, D.-J. Chen, Y.-H. Li, F.-Y. Zheng, H.-W. Yu, *Sens. Actuat. B: Chem.* 2016, **237**, 487–494. DOI: 10.1016/j.snb.2016.06.122.

13. H.F. Zhou, S.X. Li, Y.J. Wu, D.J. Chen, Y.H. Li, F.Y. Zheng, H.W. Yu. *Sens. Actuat. B: Chem.* 2016, **237**, 487-494. DOI: 10.1016/j.snb.2016.06.122.
14. M.Y. Yu, J.H. Liu, C. Liu, W.Y. Pei, J.F. Ma, *Sens. Actuat. B: Chem.* 2021, **347**, 130604. DOI: 10.1016/j.snb.2021.130604.
15. L. He, Y. Dong, Y. Zheng, Q. Jia, S. Shan, Y. Zhang, *J. Hazard Mater.* 2019, **361**, 85-94. DOI: 10.1016/j.jhazmat.2018.08.079.
16. F.P. Ma, S. Jin, Y.G. Li, Y.F. Feng, Y.B. Tong, B.C. Ye, *J. Electroanal. Chem.* 2022, **904**, 115932. DOI: 10.1016/j.jelechem.2021.115932.
